# Supplementary material
Source: publisher site journal article supplement (https://www.dovepress.com/article/497125)
Supplement: Supplementary file 1 [file get_supplementary_file.php]

**Table S1 Description of the Model Parameters**

| **Stakeholders** | **Parameters** | **Definition** |
| --- | --- | --- |
| **Primary healthcare institutions** | Cz1 | The cost of maintaining the basic operations of primary healthcare institutions. |
| R1 | The revenue for maintaining the basic operations of primary healthcare institutions. |
| Cr | The cost of operating fever clinics in primary healthcare institutions. |
| E1 | The gains obtained by primary healthcare institutions from treating patients with fever. |
| Mt | The subsidies received by primary healthcare institutions for referring patients to higher-level healthcare institutions. |
| α | The allocation coefficient of government subsidies for primary healthcare institutions. |
| V1 | The additional benefits of primary healthcare institutions when not participating in collaboration. |
| P1 | The losses caused by patient complaints when primary healthcare institutions do not participate in collaboration. |
| L1 | The probability of primary healthcare institutions being reported by the public. |
| r | The allocation coefficient of additional revenue for primary healthcare institutions when participating in three-party collaboration. |
| **Non-primary healthcare institutions** | Cz2 | The cost of maintaining the basic operations of non-primary healthcare institutions. |
| R2 | The revenue for maintaining the basic operations of non-primary healthcare institutions. |
| C2 | The cost of operating fever clinics in non-primary healthcare institutions. |
| E2 | The gains obtained by non-primary healthcare institutions from treating patients with fever. |
| C3 | The baseline loss of non-primary healthcare institutions during medical resource overloading. |
| C4 | The additional loss incurred by non-primary healthcare institutions during medical resource overloading. |
| d | The probability of medical resource overloading. |
| (1-α) | The allocation coefficient of government subsidies for non-primary healthcare institutions. |
| (1-r) | The additional revenue of non-primary healthcare institutions when participating in three-party collaboration. |
| V2 | The additional benefits of non-primary healthcare institutions when not participating in collaboration. |
| K | The losses incurred by non-primary healthcare institutions due to hospital-acquired infections. |
| b | The probability of hospital-acquired infections occurring in non-primary healthcare institutions. |
| P2 | The losses caused by patient complaints when non-primary healthcare institutions do not participate in collaboration. |
| L2 | The probability of non-primary healthcare institutions being reported by the public. |
| **Government** | Rc | The basic tax revenue of the government. |
| Cg | The cost of maintaining the basic operations of government. |
| Cs | The cost of active supervision by the government. |
| W1 | The penalty imposed on primary healthcare institutions for not participating in collaboration. |
| W2 | The penalty imposed on non-primary healthcare institutions for not participating in collaboration. |
| Sg | The subsidies provided by the government to healthcare institutions. |
| Ec | The additional benefits to the government when participating in the three-party collaboration. |
| T | The incentives provided by the government to healthcare institutions when participating in three-party collaboration. |
| P3 | The losses caused by passive supervision by the government. |
| L3 | public discovery probability |
